# Supplementary material
Source: publisher figshare collection journal article supplement (https://acs.figshare.com/ndownloader/files/9592825)
Supplement: Supplementary file 1 [file 9592825]

## Supporting Information

Synthesis of Stable [28 $\pi$ ] *m*-Benzihexaphyrins (1.0.0.1.1.1)

Sunit Kumar and Mangalampalli Ravikanth\*

Indian Institute of Technology, Powai, Mumbai, 400076, India, Fax: 91-22-5723480;

Tel: 91-22-5767176; E-mail: [ravikanth@chem.iitb.ac.in](mailto:ravikanth@chem.iitb.ac.in)

| S. No. | Contents                                                                                                                                                                                                                          | Page No. |
|--------|-----------------------------------------------------------------------------------------------------------------------------------------------------------------------------------------------------------------------------------|----------|
| 1      | <b>Figure S1a:</b> Comparison of absorption spectra of compounds <b>1-4</b> ( $1 \times 10^{-5}$ M) free base and in presence of TFA (excess of equivalents) recorded in $\text{CHCl}_3$ solution at room temperature.            | S3       |
| 2      | <b>Figure S1b:</b> Absorption spectra of compounds <b>1</b> ( $1 \times 10^{-5}$ M) in presence of various acids (excess of equivalents) recorded in $\text{CHCl}_3$ solution at room temperature.                                | S3       |
| 3      | <b>Figure S2a.</b> Partial $^1\text{H}$ NMR spectra of compound <b>1</b> ( $3 \times 10^{-3}$ M) in the presence of different concentrations of TFA in $\text{CDCl}_3$ at 233 K. Concentration of TFA was varied from 0-20 equiv. | S4       |
| 4      | <b>Figure S2b.</b> NOE spectra of compound <b>1H</b> <sup>2+</sup> recorded in $\text{CDCl}_3$ at 233 K.                                                                                                                          | S5       |
| 5      | <b>Figure S2c.</b> Comparison of $^1\text{H}$ NMR spectra of compound <b>1-4</b> recorded in $\text{CDCl}_3$                                                                                                                      | S5       |
| 6      | <b>Figure S3.</b> HR mass spectrum of compound <b>5</b>                                                                                                                                                                           | S6       |
| 7      | <b>Figure S4.</b> $^1\text{H}$ NMR spectrum of compound <b>5</b> recorded in $\text{CDCl}_3$                                                                                                                                      | S7       |
| 8      | <b>Figure S5.</b> $^{13}\text{C}$ NMR spectrum of compound <b>5</b> recorded in $\text{CDCl}_3$                                                                                                                                   | S7       |
| 9      | <b>Figure S6.</b> HR mass spectrum of compound <b>6</b>                                                                                                                                                                           | S8       |
| 10     | <b>Figure S7.</b> $^1\text{H}$ NMR spectrum of compound <b>6</b> recorded in $\text{CDCl}_3$                                                                                                                                      | S9       |
| 11     | <b>Figure S8.</b> $^{13}\text{C}$ NMR spectrum of compound <b>6</b> recorded in $\text{CDCl}_3$                                                                                                                                   | S9       |
| 12     | <b>Figure S9.</b> HR mass spectrum of compound <b>1</b>                                                                                                                                                                           | S10      |
| 13     | <b>Figure S10.</b> $^{13}\text{C}$ NMR spectrum of compound <b>1</b> recorded in $\text{CDCl}_3$                                                                                                                                  | S11      |
| 14     | <b>Figure S11.</b> HR mass spectrum of compound <b>2</b>                                                                                                                                                                          | S12      |
| 15     | <b>Figure S12.</b> $^1\text{H}$ NMR spectrum of compound <b>2</b> recorded in $\text{CDCl}_3$ .                                                                                                                                   | S13      |
| 16     | <b>Figure S13.</b> $^{13}\text{C}$ NMR spectrum of compound <b>2</b> recorded in $\text{CDCl}_3$                                                                                                                                  | S13      |

---

|    |                                                                                                                 |            |
|----|-----------------------------------------------------------------------------------------------------------------|------------|
| 17 | <b>Figure S14.</b> HR mass spectrum of compound <b>3</b>                                                        | <b>S14</b> |
| 18 | <b>Figure S15.</b> $^1\text{H}$ NMR spectrum of compound <b>3</b> recorded in $\text{CDCl}_3$                   | <b>S15</b> |
| 19 | <b>Figure S16.</b> $^1\text{H}$ - $^1\text{H}$ COSY spectrum of compound <b>3</b> recorded in $\text{CDCl}_3$ . | <b>S16</b> |
| 20 | <b>Figure S17.</b> $^{13}\text{C}$ NMR spectrum of compound <b>3</b> recorded in $\text{CDCl}_3$                | <b>S17</b> |
| 21 | <b>Figure S18.</b> HR mass spectrum of compound <b>4</b>                                                        | <b>S18</b> |
| 22 | <b>Figure S19.</b> $^1\text{H}$ NMR spectrum of compound <b>4</b> recorded in $\text{CDCl}_3$                   | <b>S19</b> |
| 23 | <b>Figure S20.</b> $^1\text{H}$ - $^1\text{H}$ COSY spectrum of compound <b>4</b> recorded in $\text{CDCl}_3$ . | <b>S20</b> |
| 24 | <b>Figure S21.</b> $^{13}\text{C}$ NMR spectrum of compound <b>4</b> recorded in $\text{CDCl}_3$                | <b>S21</b> |

---

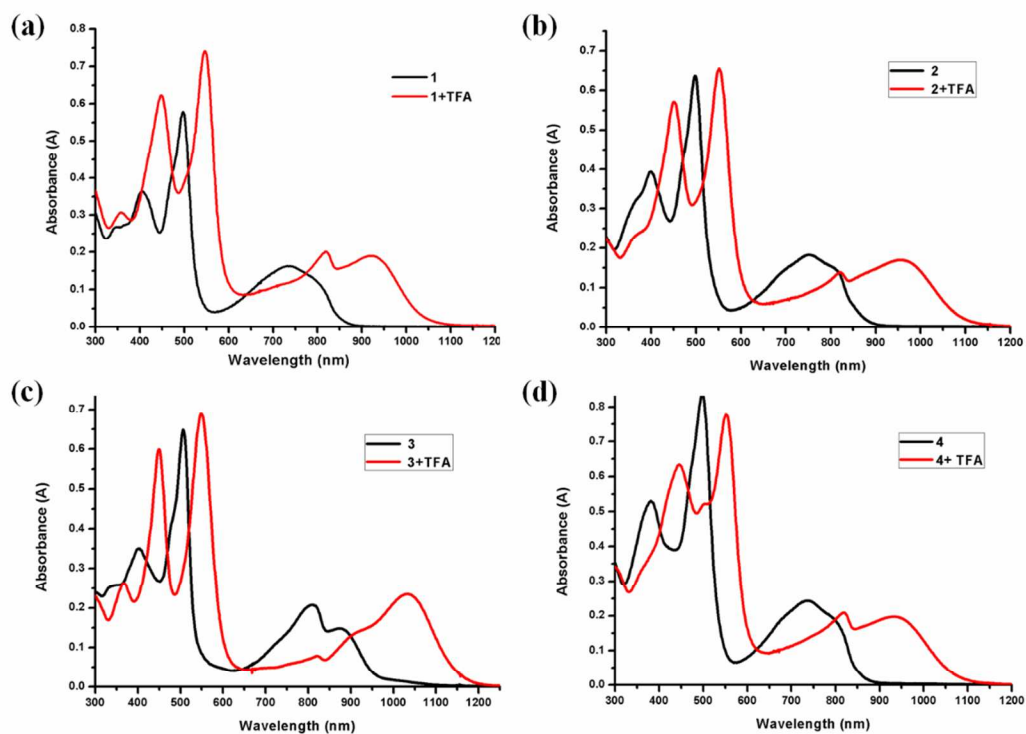

**Figure S1a:** Comparison of absorption spectra of compounds **1-4** ( $1 \times 10^{-5}$  M) free base and in presence of TFA (excess of equivalents) recorded in  $\text{CHCl}_3$  solution at room temperature.

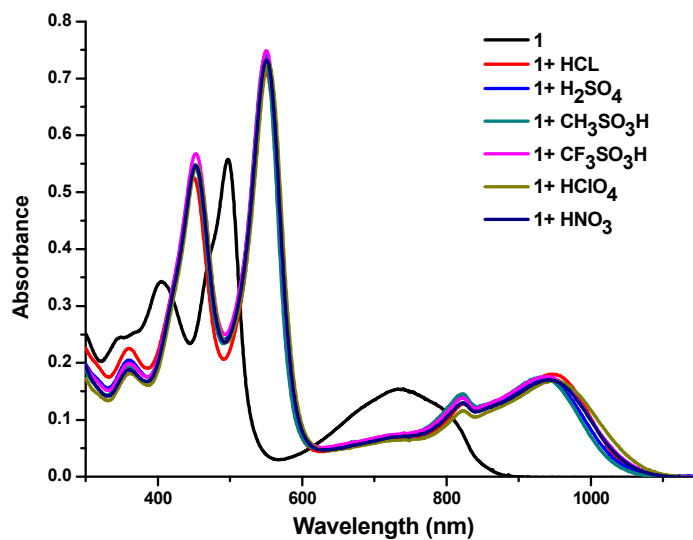

**Figure S1b:** Absorption spectra of compounds **1** ( $1 \times 10^{-5}$  M) in presence of various acids (excess of equivalents) recorded in  $\text{CHCl}_3$  solution at room temperature.

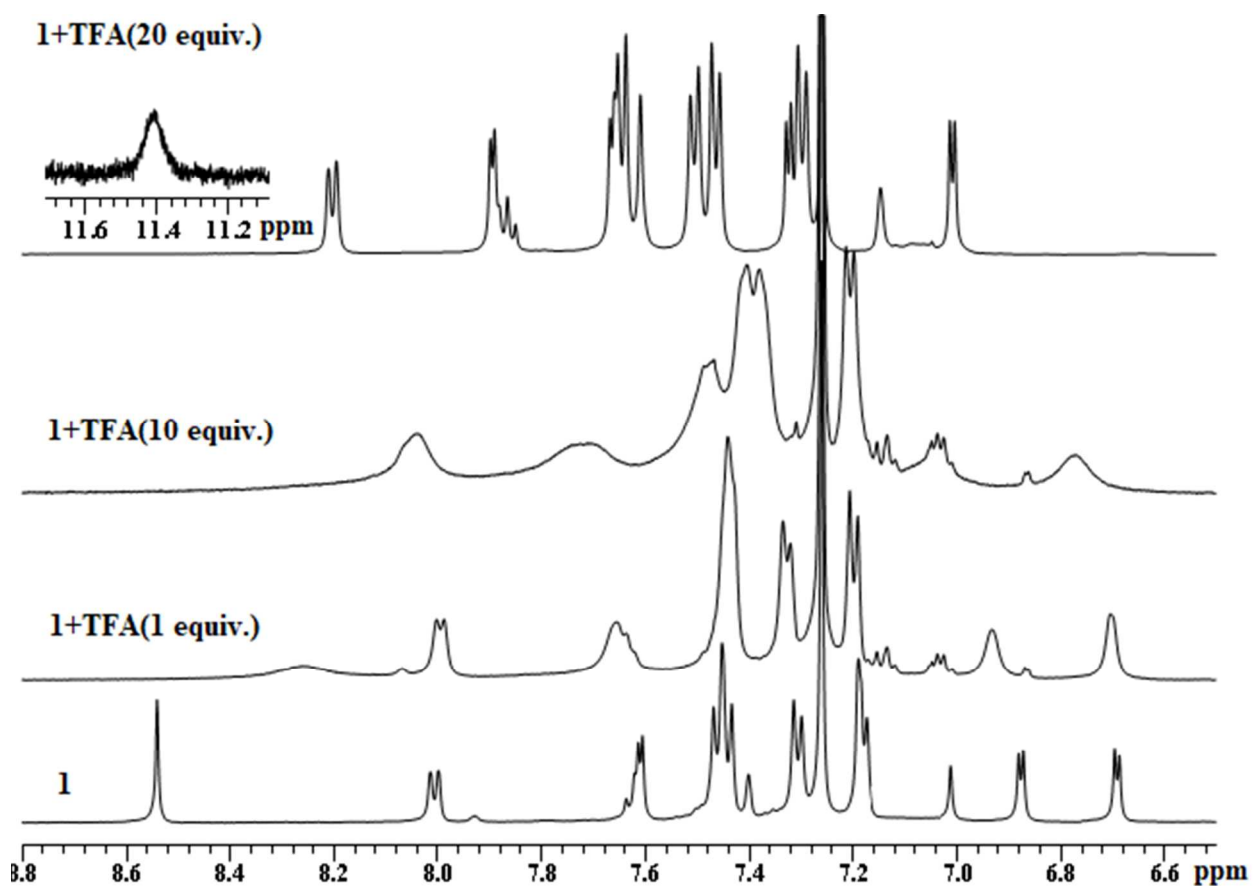

**Figure S2a.** Partial <sup>1</sup>H NMR spectra of compound **1** ( $3 \times 10^{-3}$  M) in the presence of different concentrations of TFA in CDCl<sub>3</sub> at 233 K. Concentration of TFA was varied from 0-20 equiv.

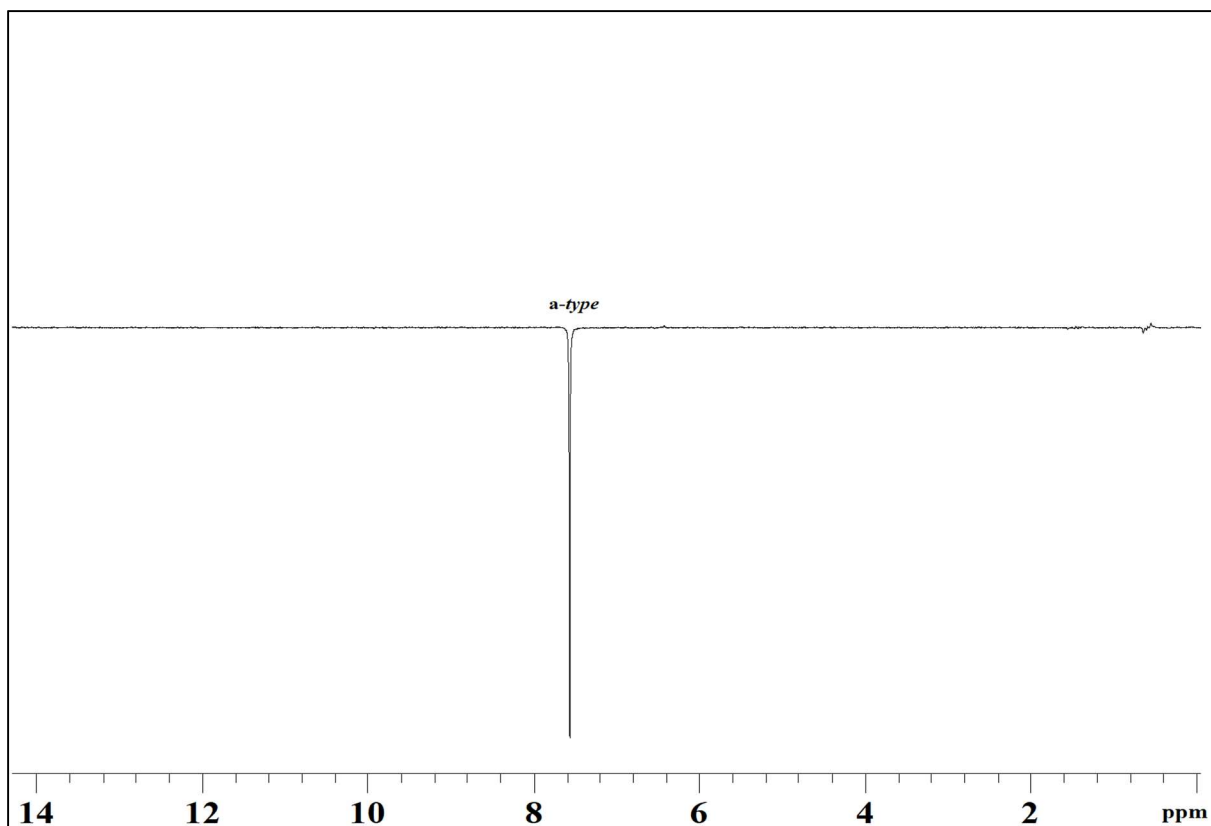

Figure S2b. NOE spectrum of compound  $1\text{H}^{2+}$  recorded in  $\text{CDCl}_3$  at 233 K.

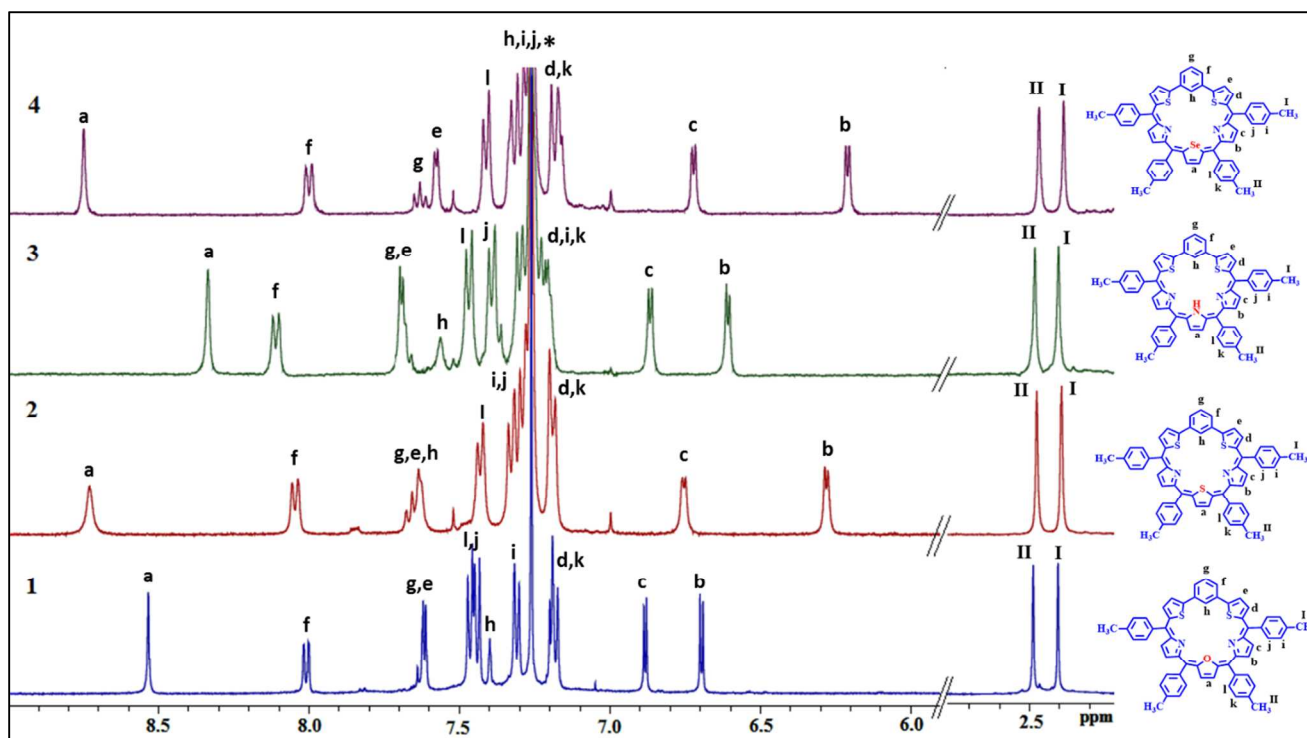

Figure S2c. Comparison of  $^1\text{H}$  NMR spectra of compound 1-4 recorded in  $\text{CDCl}_3$ .

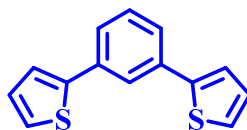

5

---

 DEPARTMENT OF CHEMISTRY, I.I.T.(B)
 

---

## Analysis Info

Analysis Name D:\Data\OCT 2017\MR-SK-BITHIA.d  
 Method Tune\_pos\_NAF-500.m  
 Sample Name MR-SK-BITHIA  
 Comment C14H10S2

Acquisition Date 10/5/2017 4:07:08 PM

Operator iitb  
 Instrument maXis impact 282001.00081

## Acquisition Parameter

|             |         |                       |           |                  |           |
|-------------|---------|-----------------------|-----------|------------------|-----------|
| Source Type | ESI     | Ion Polarity          | Positive  | Set Nebulizer    | 0.3 Bar   |
| Focus       | Active  | Set Capillary         | 3700 V    | Set Dry Heater   | 180 °C    |
| Scan Begin  | 50 m/z  | Set End Plate Offset  | -500 V    | Set Dry Gas      | 4.0 l/min |
| Scan End    | 700 m/z | Set Collision Cell RF | 900.0 Vpp | Set Divert Valve | Source    |

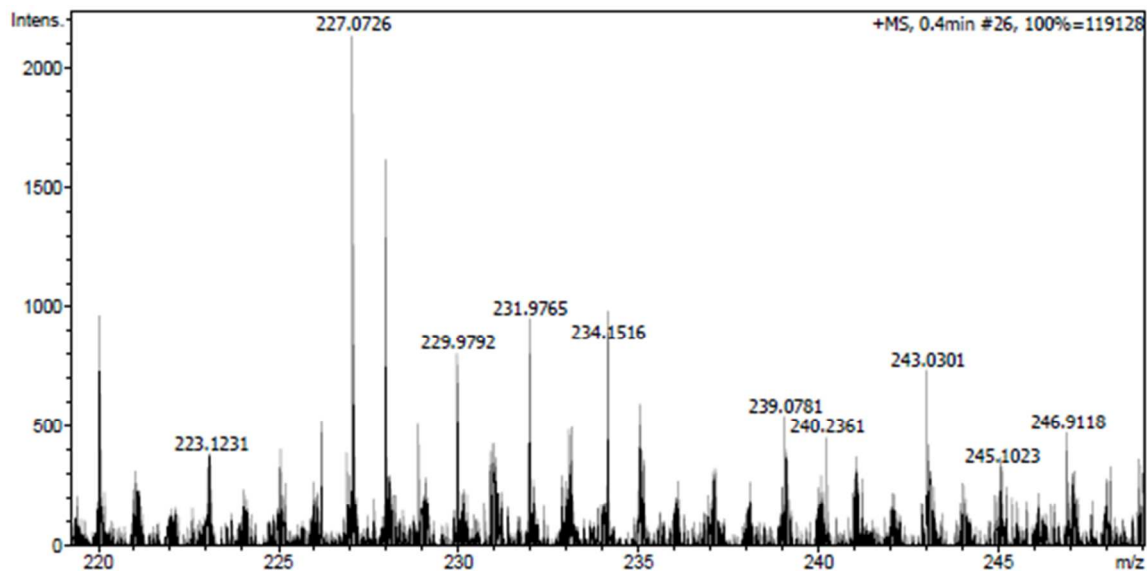

| Meas. m/z | # | Ion Formula | m/z      | err [ppm] | mSigma | # Sigma | Score  | rdB | e <sup>-</sup> | Conf | N-Rule |
|-----------|---|-------------|----------|-----------|--------|---------|--------|-----|----------------|------|--------|
| 243.0301  | 1 | C14H11S2    | 243.0297 | -1.7      | 107.0  | 1       | 100.00 | 9.5 | even           |      | ok     |

Figure S3. HR mass spectrum of compound 5

MR-SK-BENZIBITHIA-1H

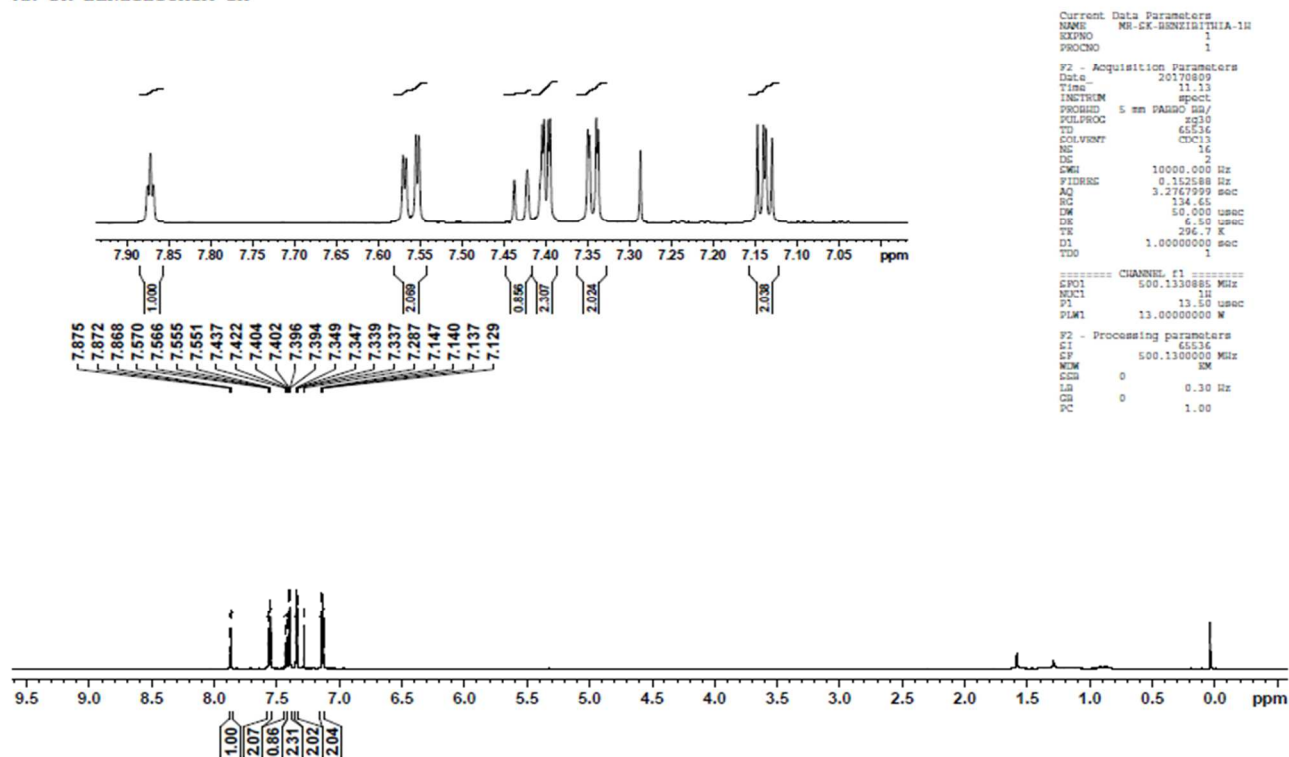Figure S4.  $^1\text{H}$  NMR spectrum of compound **5** recorded in  $\text{CDCl}_3$ 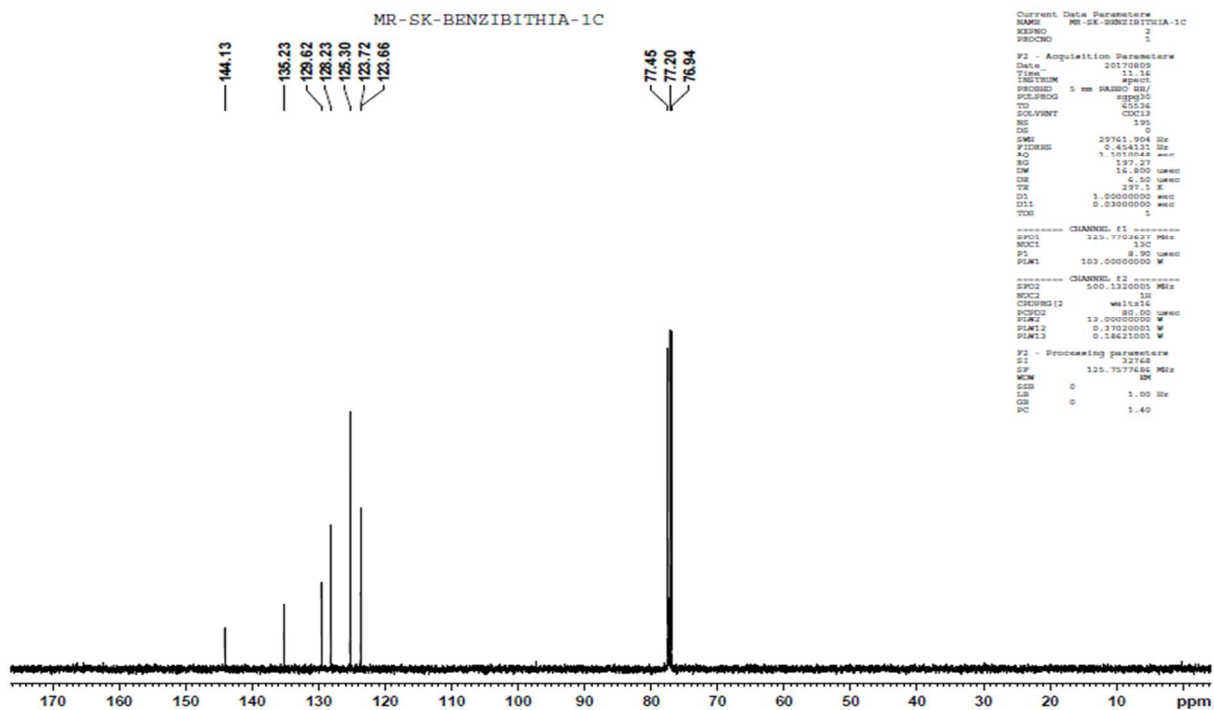Figure S5.  $^{13}\text{C}$  NMR spectrum of compound **5** recorded in  $\text{CDCl}_3$

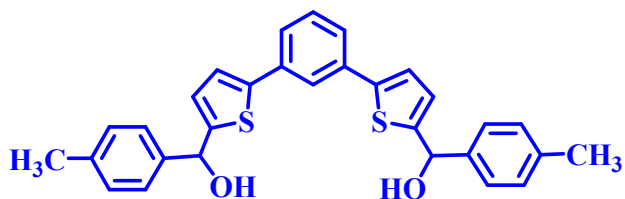

6

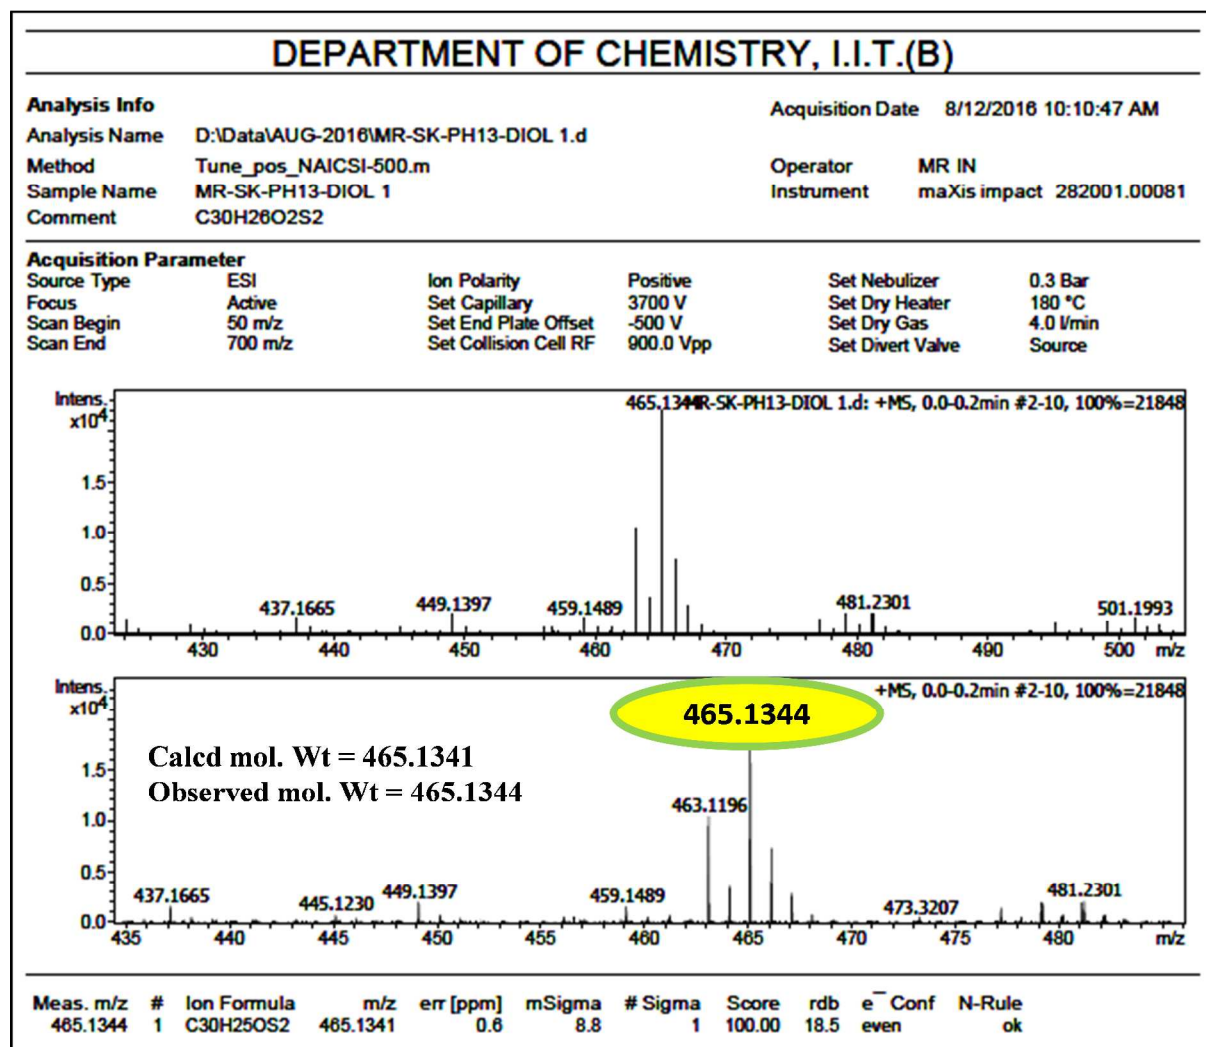

Figure S6. HR mass spectrum of compound 6

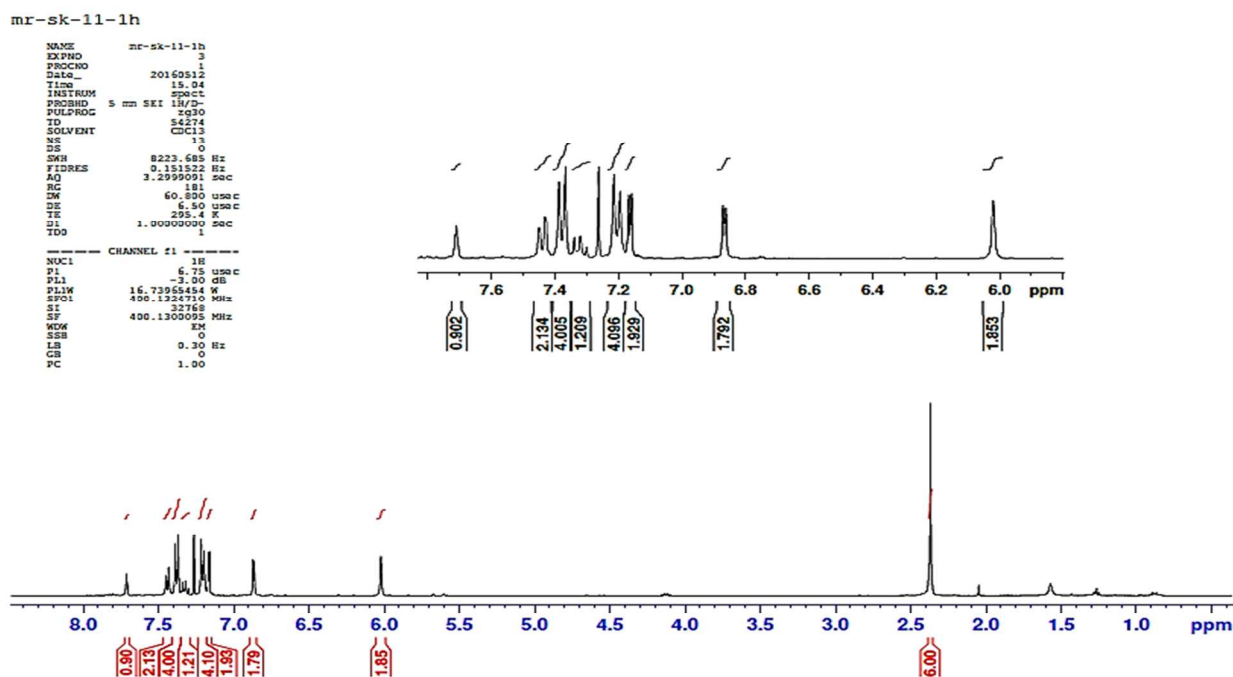

Figure S7.  $^1\text{H}$  NMR spectrum of compound **6** recorded in  $\text{CDCl}_3$

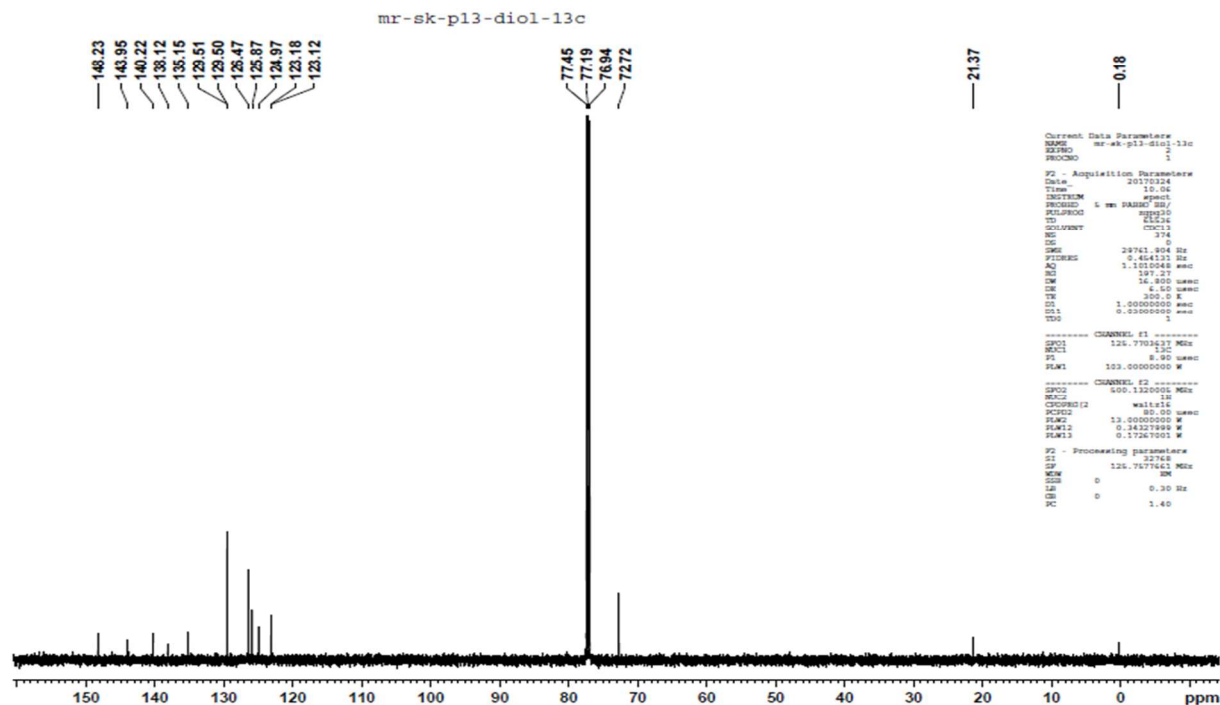

Figure S8.  $^{13}\text{C}$  NMR spectrum of compound **6** recorded in  $\text{CDCl}_3$

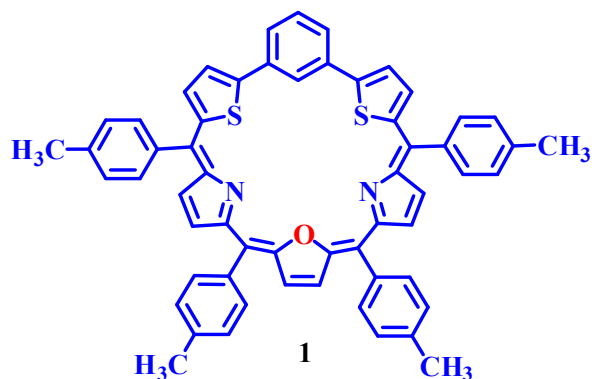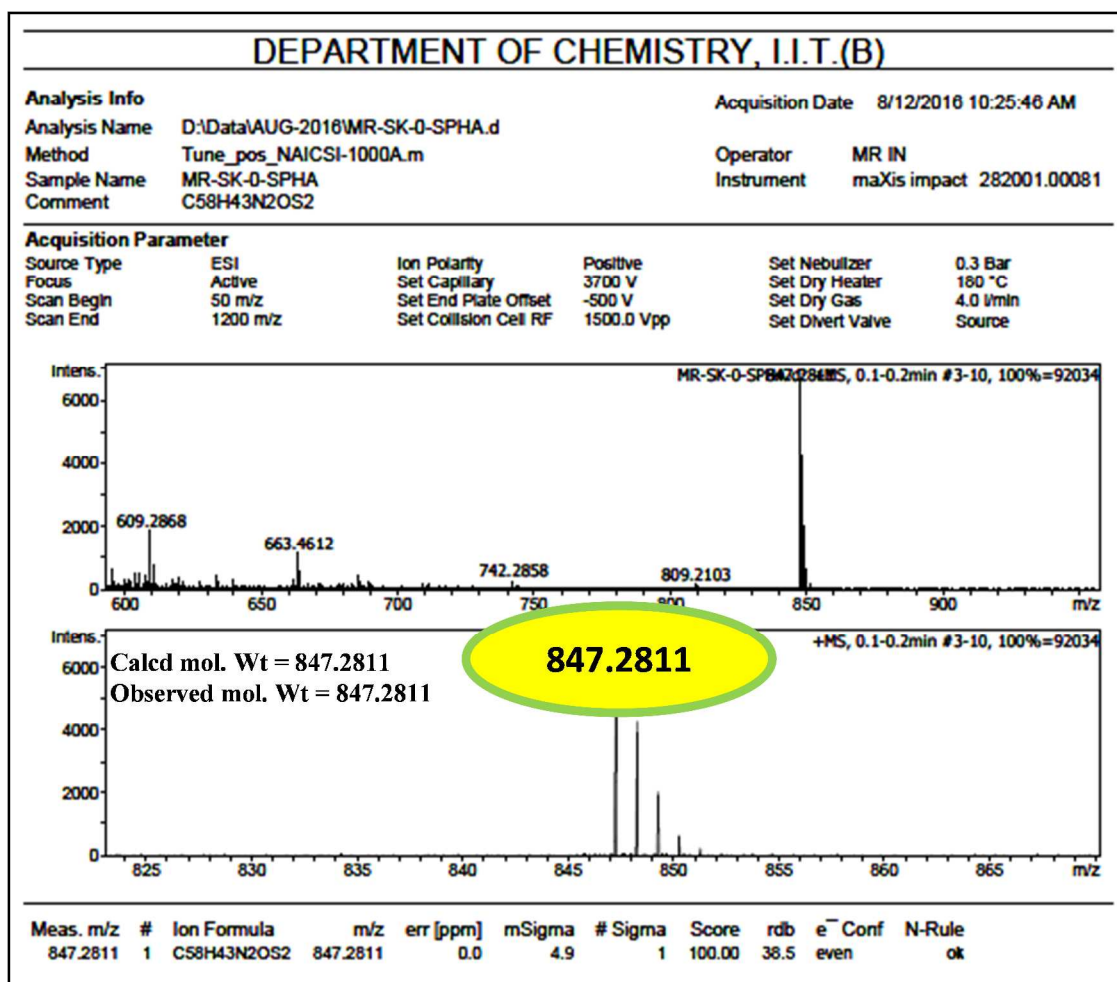

**Figure S9.** HR mass spectrum of compound 1

MR-SK-O-SPHA-13C

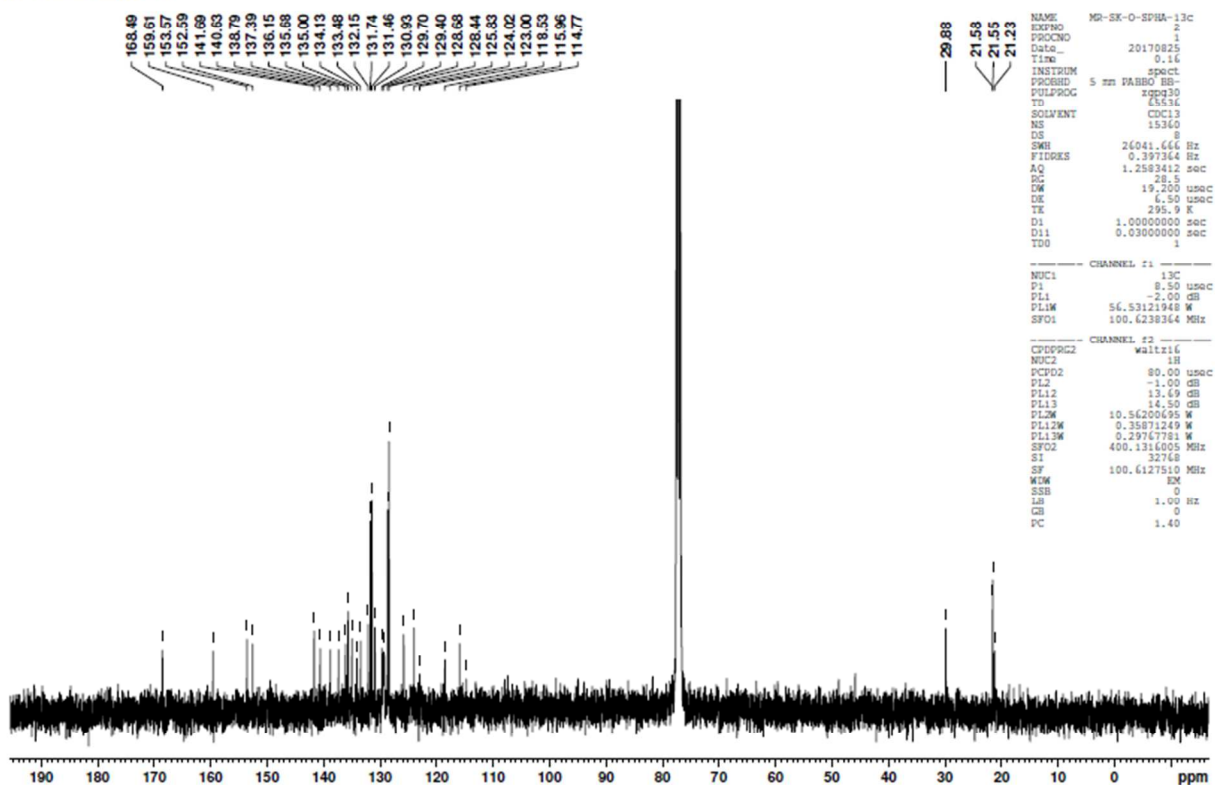

**Figure S10.**  $^{13}\text{C}$  NMR spectrum of compound **1** recorded in  $\text{CDCl}_3$

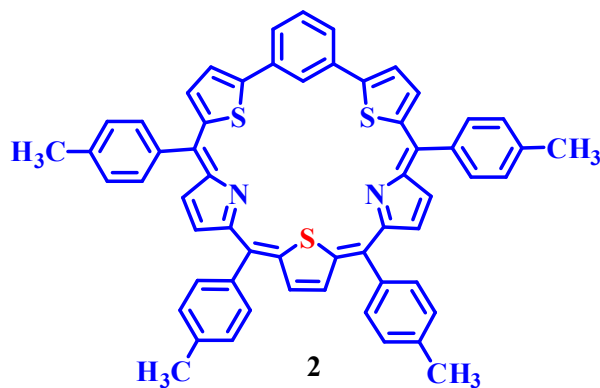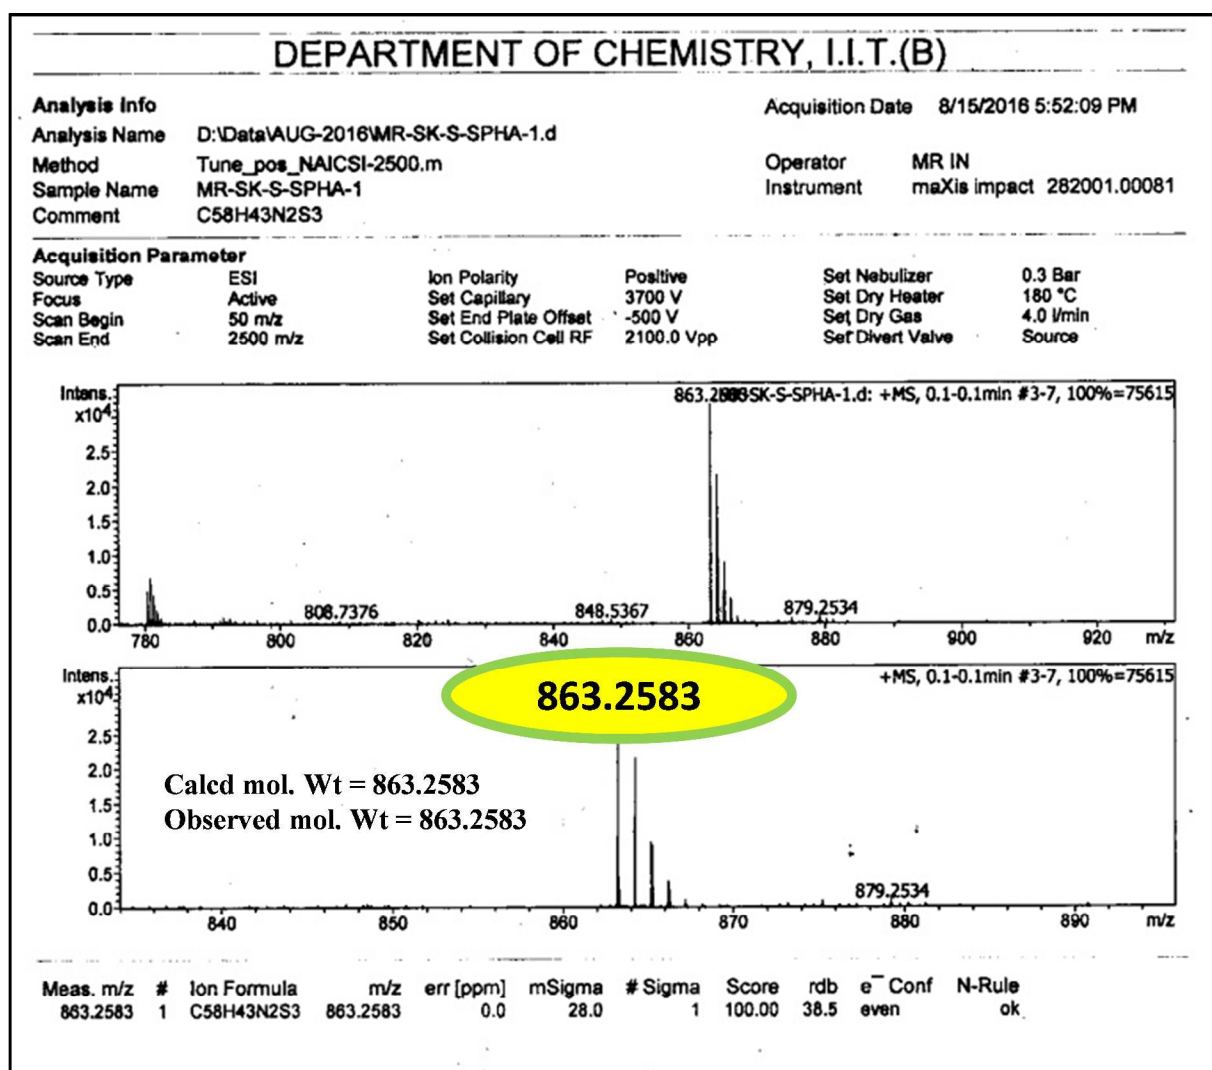

Figure S11. HR mass spectrum of compound 2

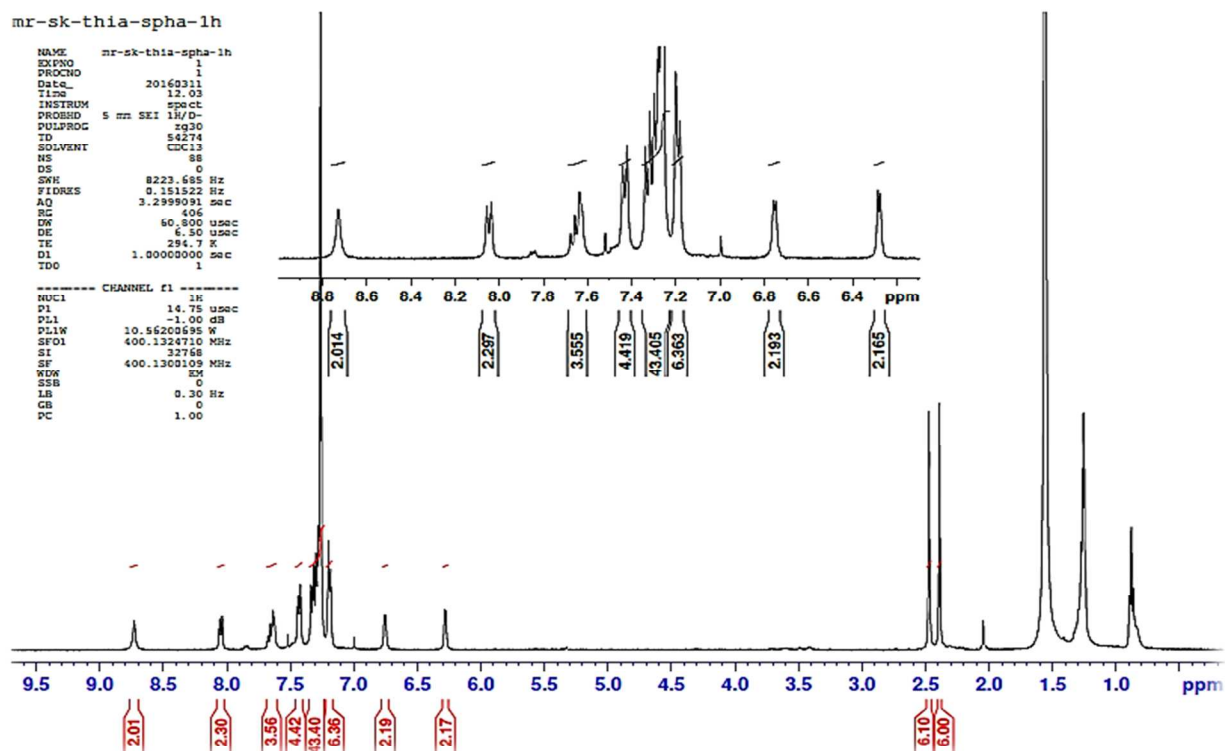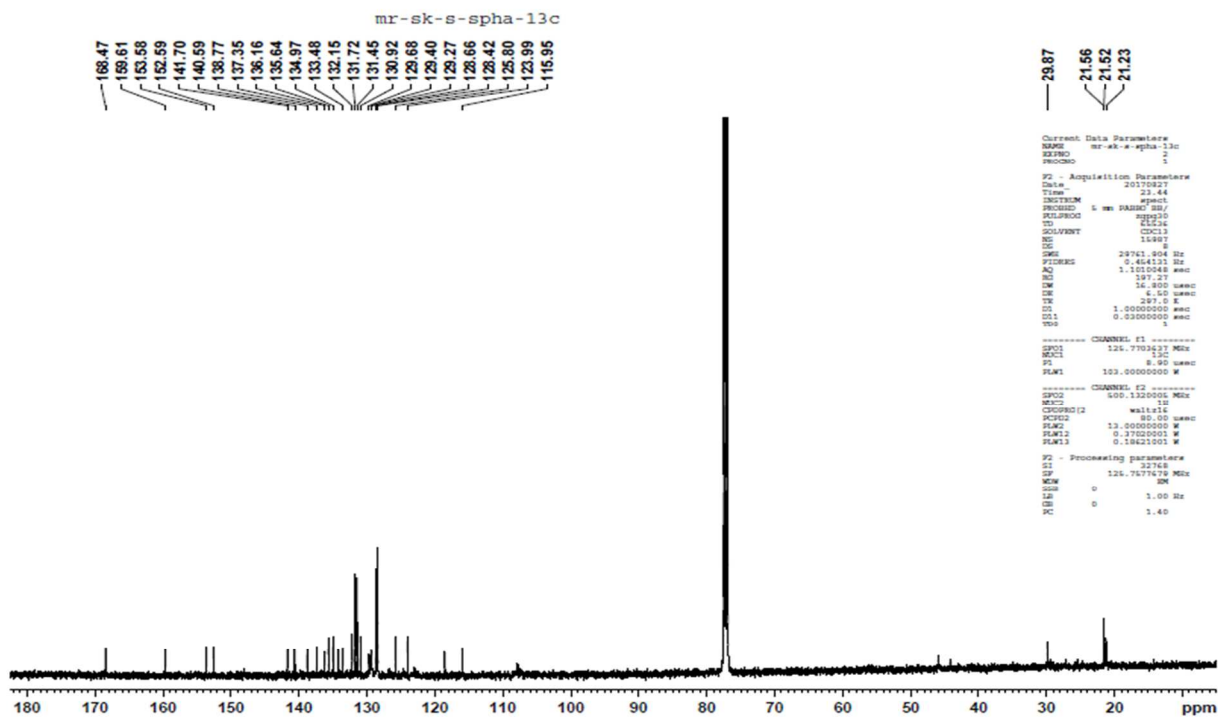

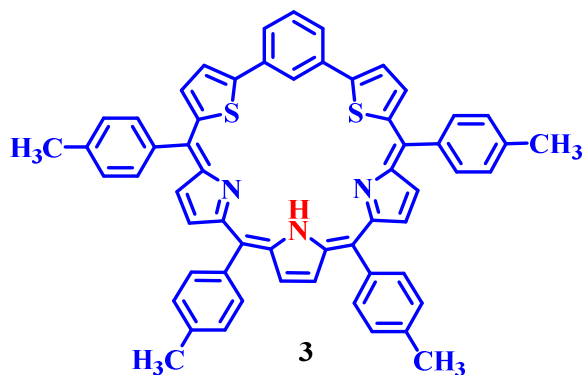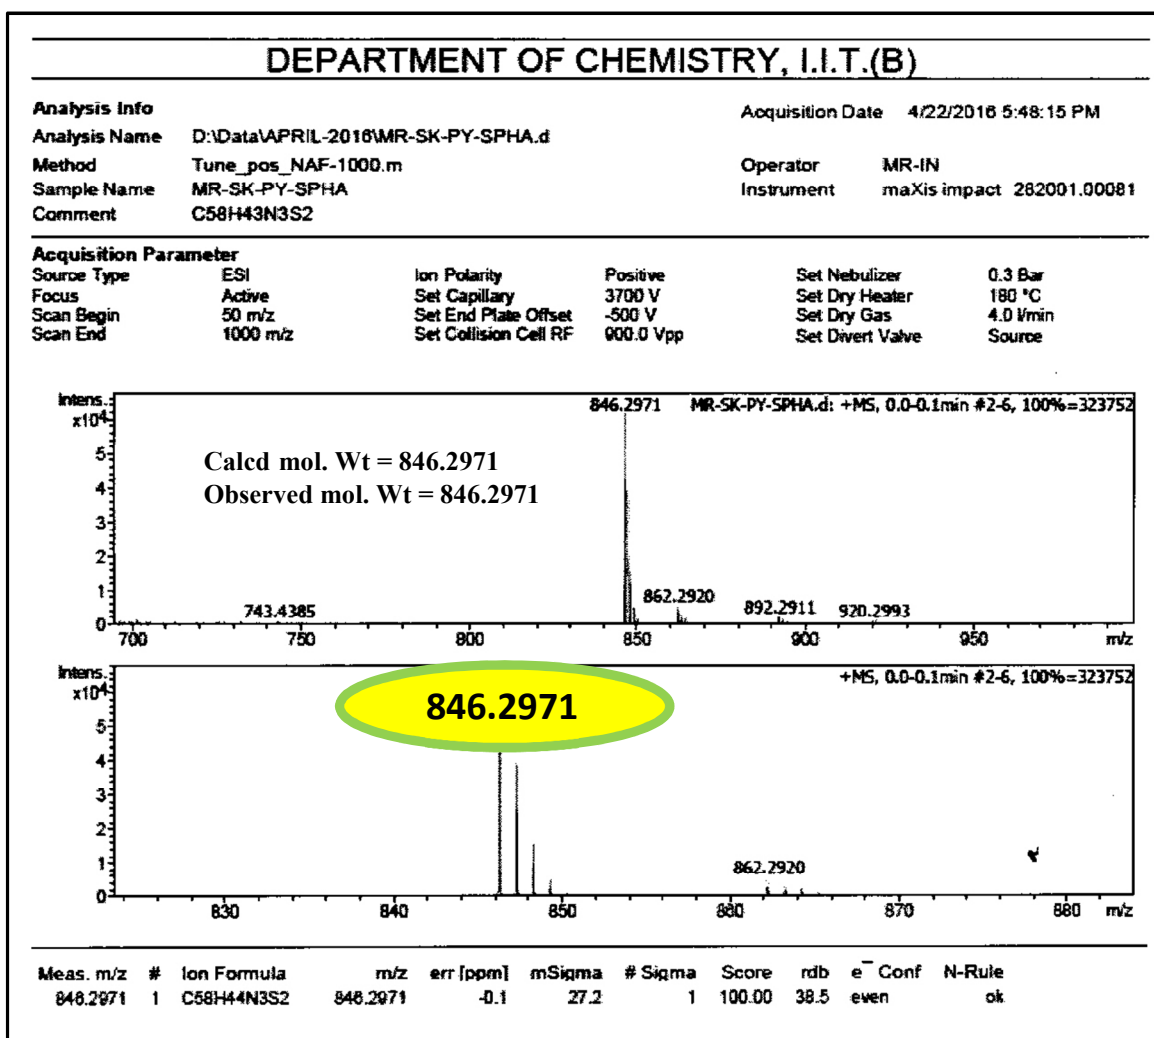

Figure S14. HR mass spectrum of compound 3

MR-SK-N-SPHA-1H

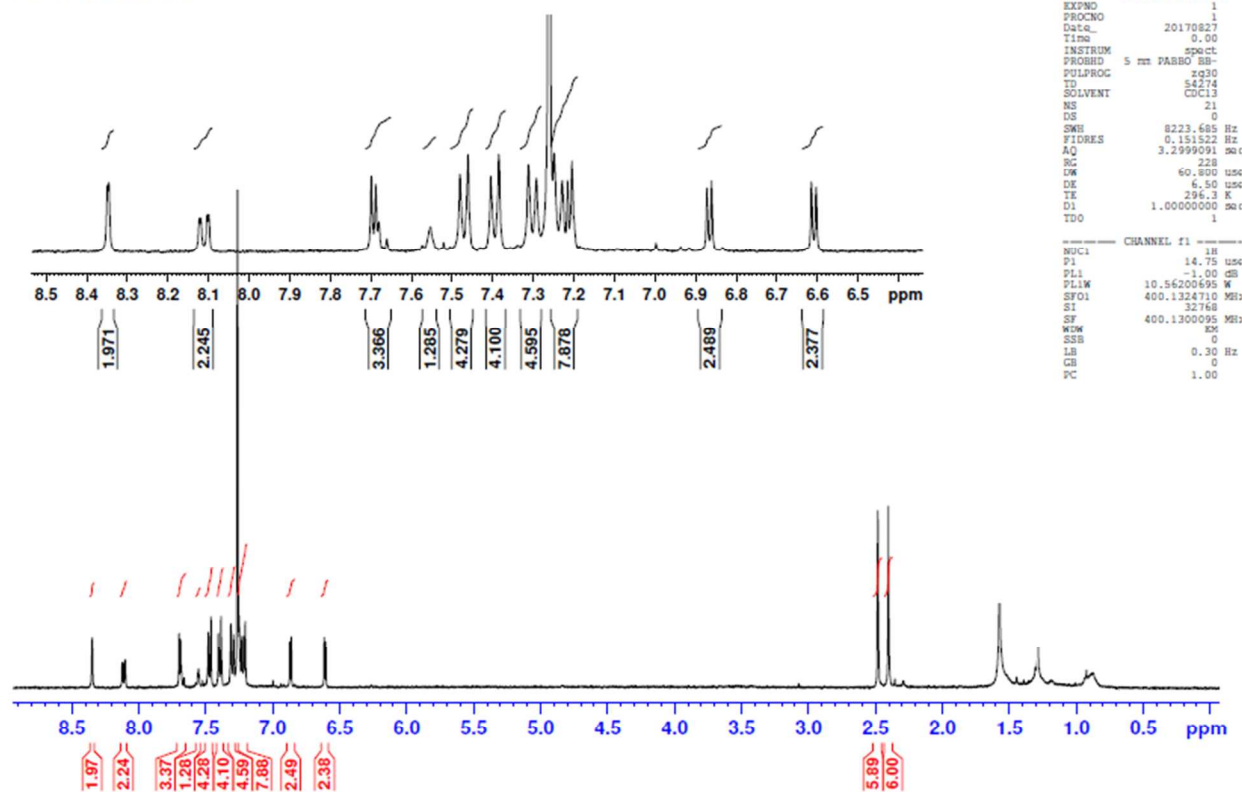

**Figure S15.**  $^1\text{H}$  NMR spectrum of compound **3** recorded in  $\text{CDCl}_3$ .

MR-SK-PY-SPHA-COSY

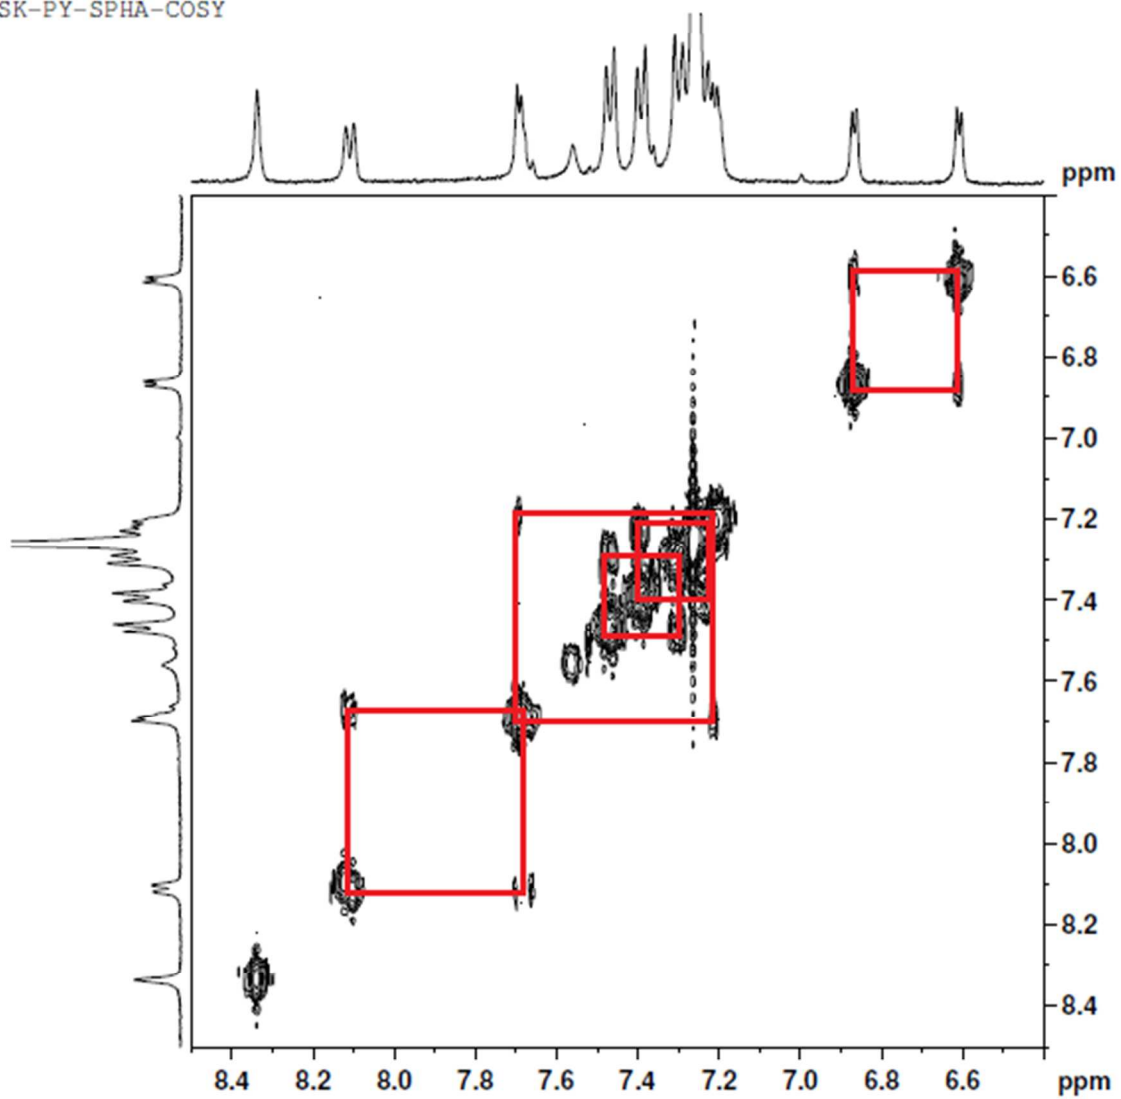

**Figure S16.**  $^1\text{H}$ - $^1\text{H}$  COSY spectrum of compound **3** recorded in  $\text{CDCl}_3$ .

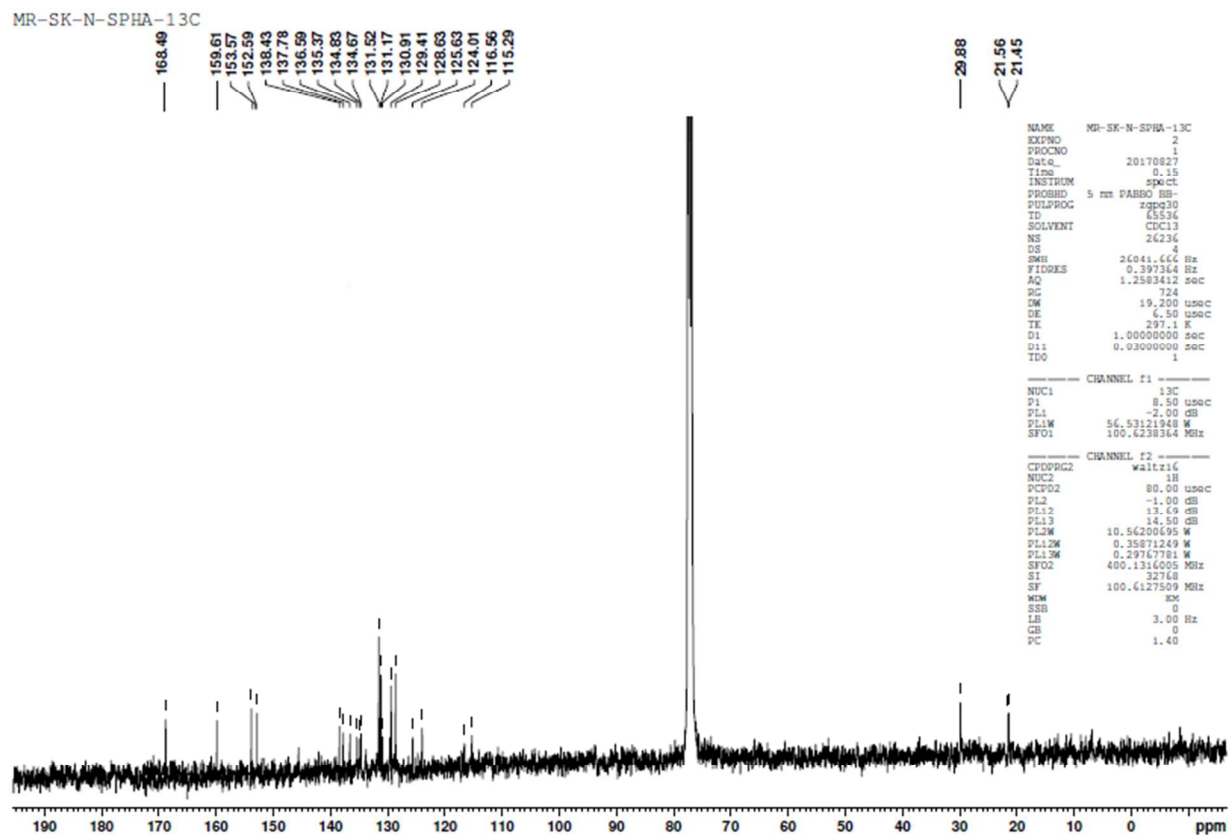

Figure S17.  $^{13}\text{C}$  NMR spectrum of compound **3** recorded in  $\text{CDCl}_3$

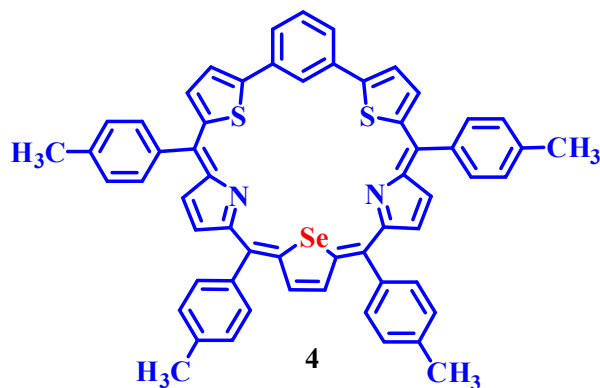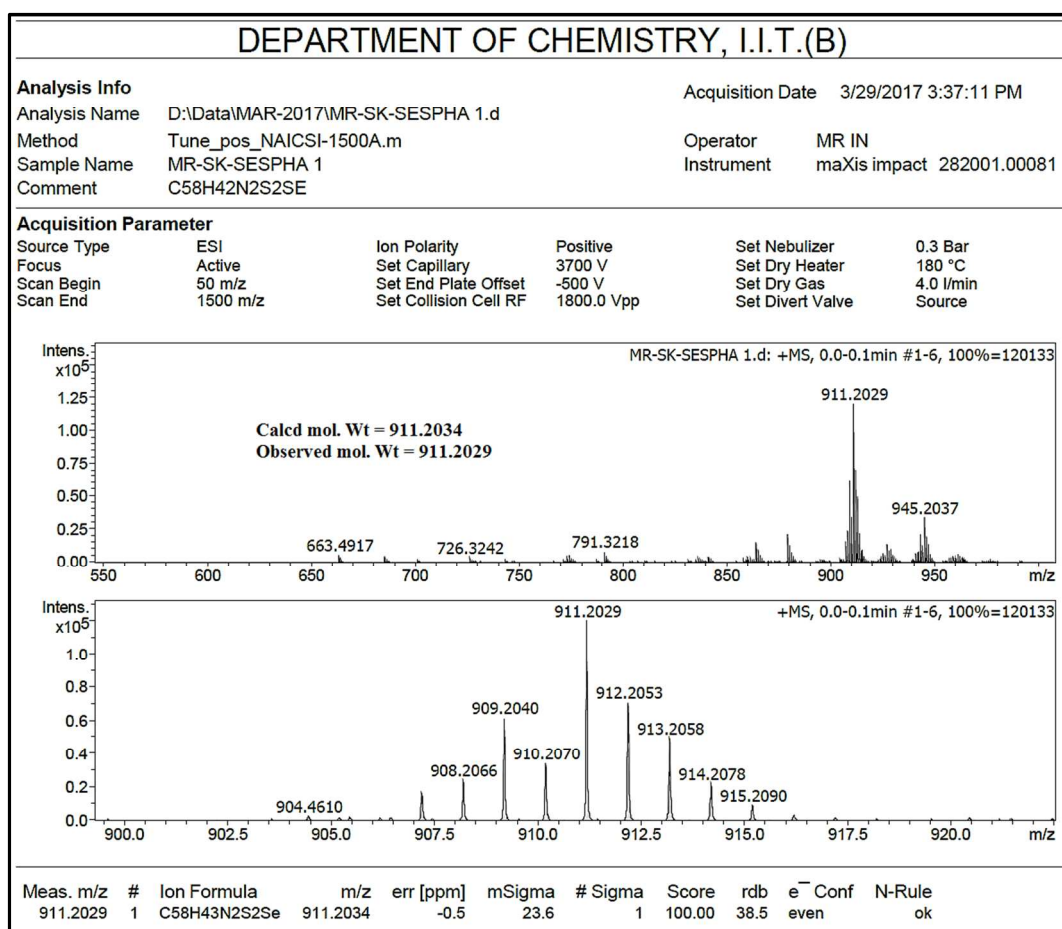

**Figure S18.** HR mass spectrum of compound **4**

MR-SK-SE-SPHA-1H

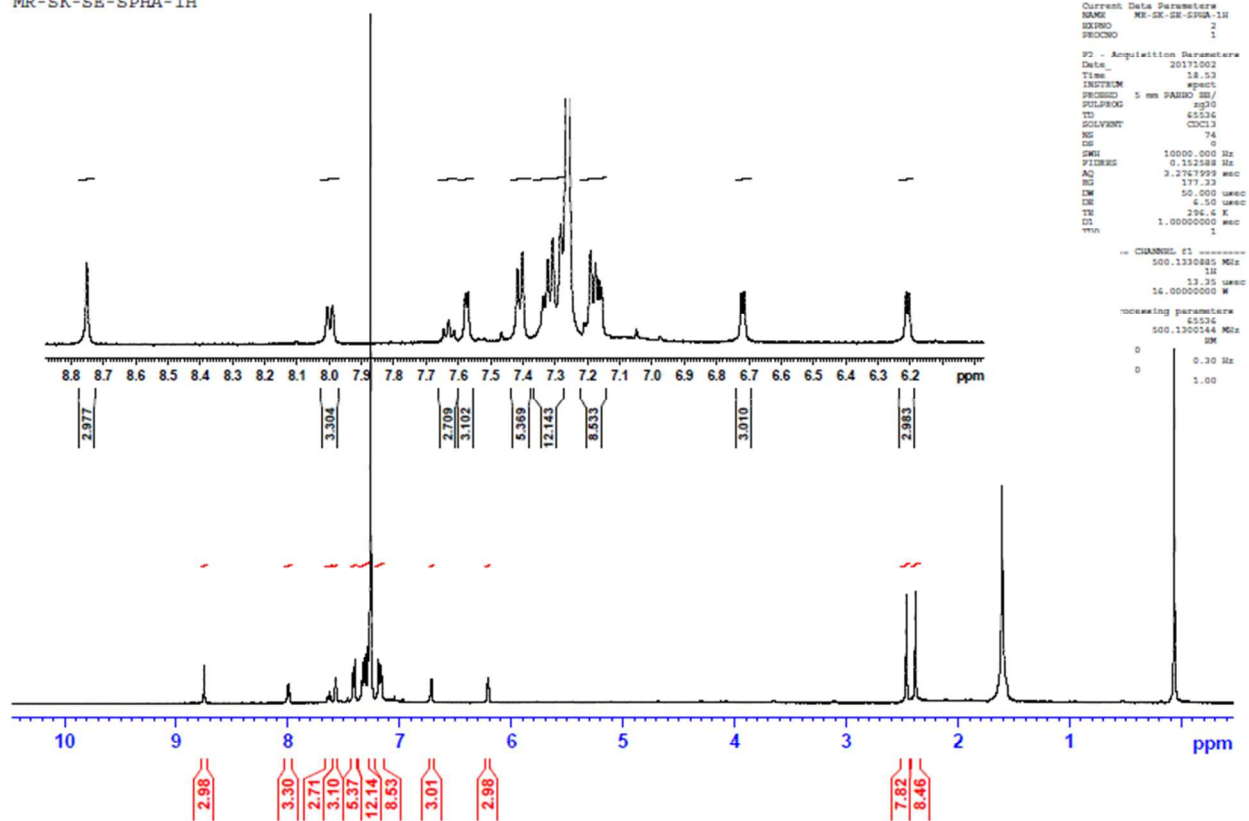

Figure S19.  $^1\text{H}$  NMR spectrum of compound **4** recorded in  $\text{CDCl}_3$ .

mr-sk-se-spha-cosy

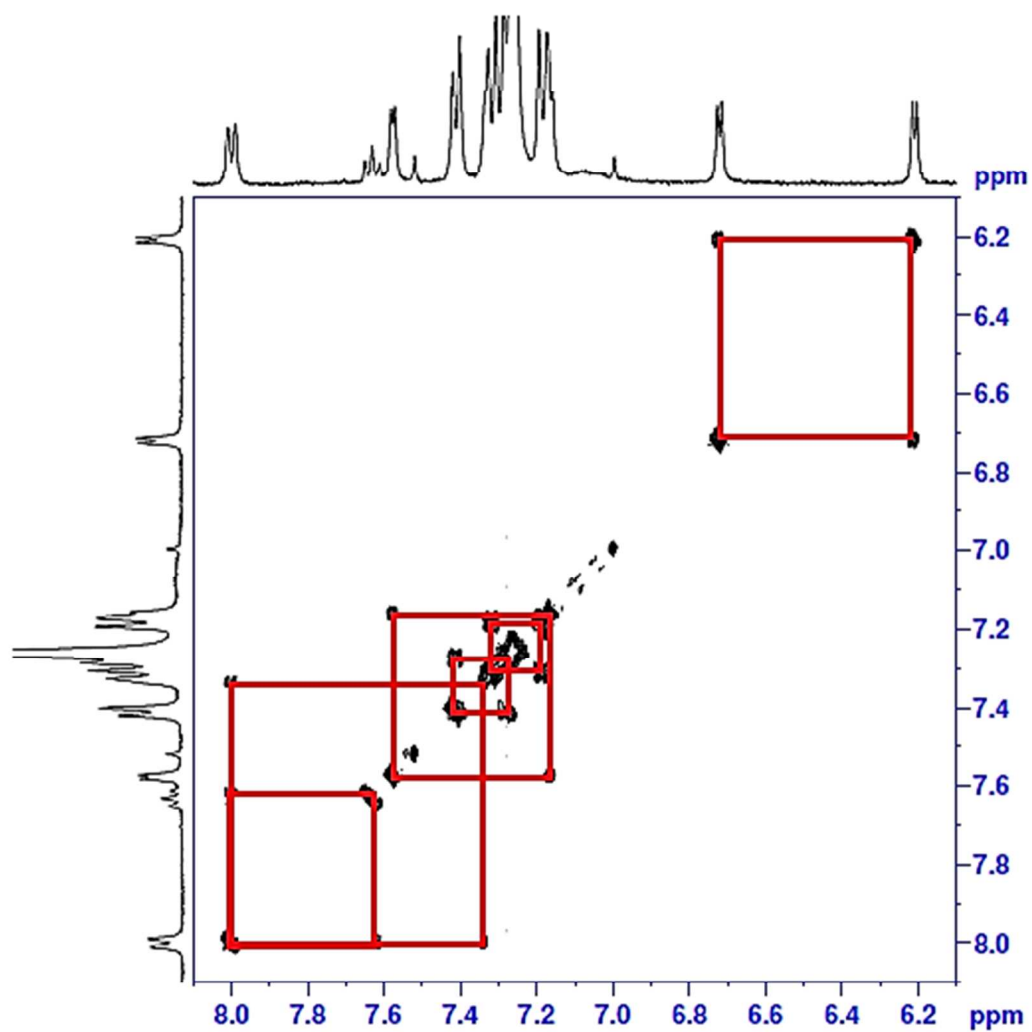

**Figure S20.**  $^1\text{H}$ - $^1\text{H}$  COSY NMR spectrum of compound **4** recorded in  $\text{CDCl}_3$ .

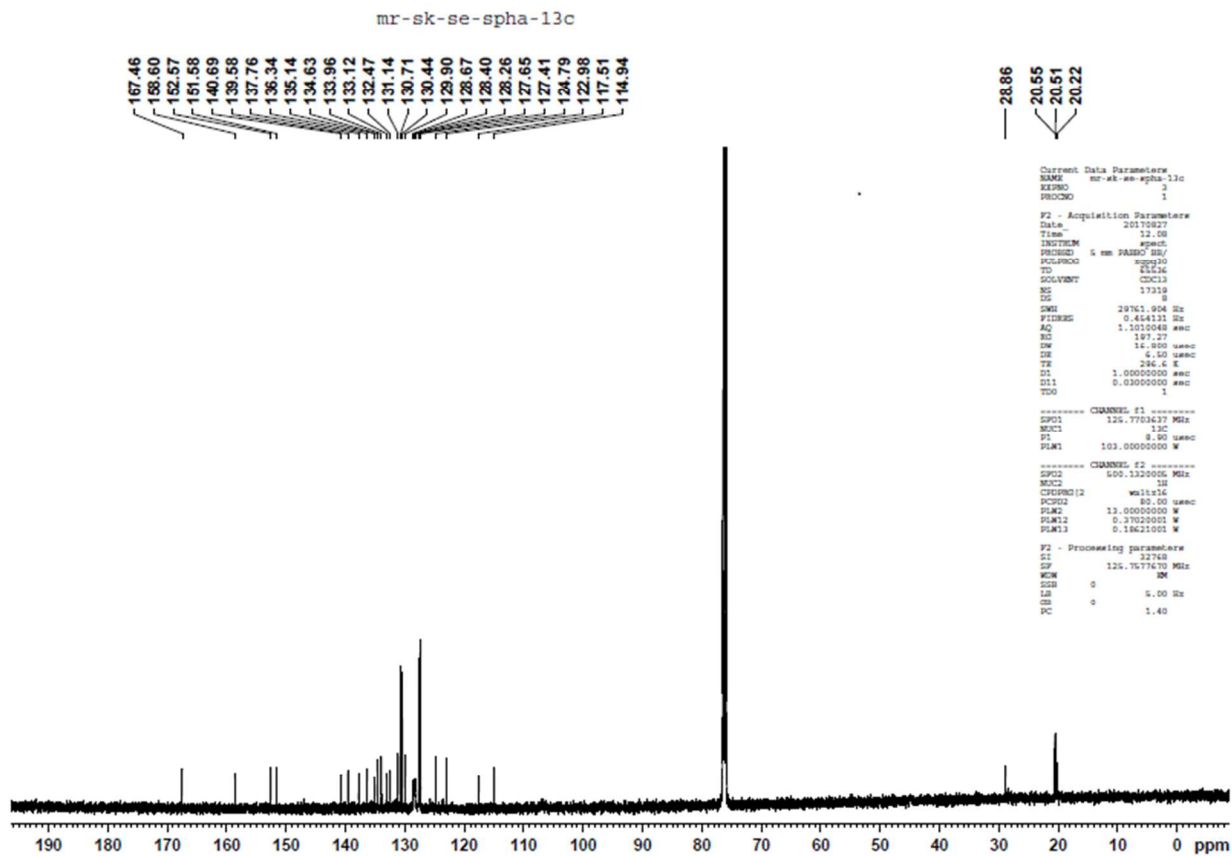

Figure S21.  $^{13}\text{C}$  NMR spectrum of compound 4 recorded in  $\text{CDCl}_3$
